# Supplementary material for: Different Polymers for the Base of Removable Dentures? Part I: A Narrative Review of Mechanical and Physical Properties
Source: MDPI journal article supplement (doi:10.3390/polym15173495), 2023-08-22
Supplement: s1 [file s1]

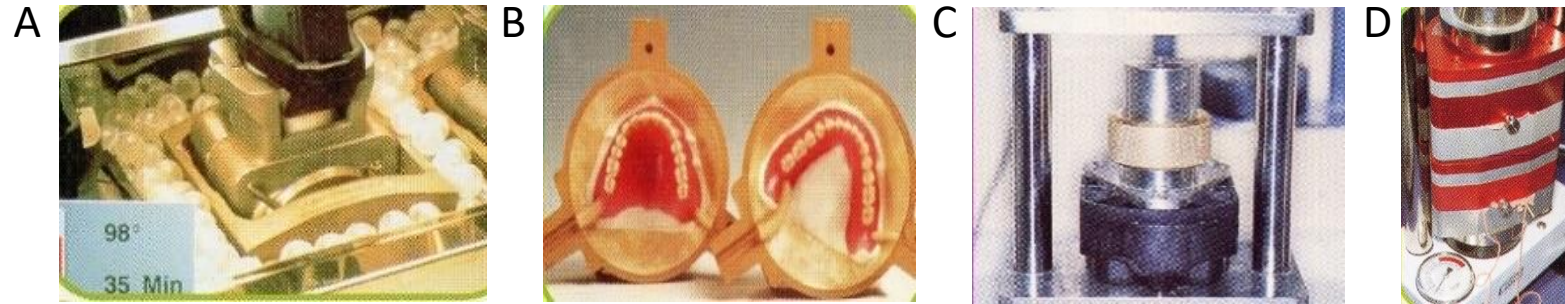

Figure S1: Different polymerization techniques of PMMA, by compression or by injection molding. SR Ivocap (Ivoclar®), cooking in boiling water, a conventional compression molded heat polymerized (Meliodent®) (A); Pala X Press (Heraeus Kulzer®), vacuum injected (B); Acron M C I (GC Europe®) microwave, a compression molded microwave-polymerized (Acron MC®) (C); Swiss-Jet-Press (Condylator service®) injected pressed technique (D).

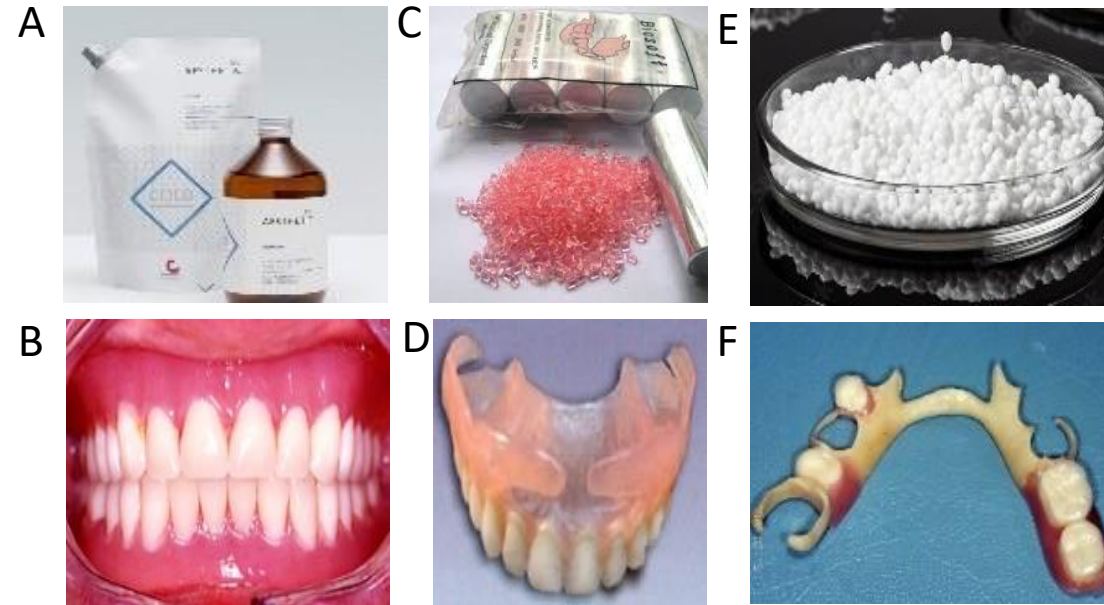

Figure S2: Polymers materials, poly-methyl-methacrylate  $(C_5O_2H_8)_n$  (A,B); polyamide valplast CO  $(OH_2)_{11}NH)_n$  (C,D); polyetheretherketone  $(-C_6H_4-O-C_6H_4-O-C_6H_4-Co-)$  (E,F).
